# Supplementary material
Source: Springer Nature journal article supplement (https://www.springermedizin.de/resource/supplementary/12936_2010_1241_MOESM3_ESM.pdf/9549308)

S1

S2 (Pimperena)

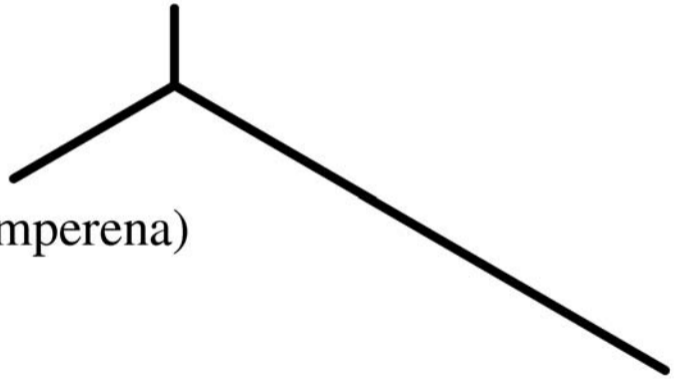

0.01

M

Supplement: MOESM3 [file 9549308]
